# Supplementary material for: Synthesis and Characterization of Chelating Hyperbranched Polyester Nanoparticles for Cd(II) Ion Removal from Water
Source: MDPI journal article supplement (doi:10.3390/molecules27123656), 2022-06-07
Supplement: s1 [file s1]

## Supplementary Data

# Synthesis and Characterization of Chelating Hyperbranched Polyester Nanoparticles for Cd(II) Ion Removal from Water

Faten Alregeb <sup>1,2</sup>, Fawwaz Khalili <sup>2</sup>, Bassam Sweileh <sup>2</sup> and Dalia Khalil Ali <sup>3,\*</sup>

<sup>1</sup> Faculty of Science Arts and Sciences, Middle East University, Amman 11610, Jordan; fregab@meu.edu.jo

<sup>2</sup> Department of Chemistry, Faculty of Science, The University of Jordan, Amman 1118, Jordan; fkhilili@ju.edu.jo (F.K.); sweilehb@ju.edu.jo (B.S.)

<sup>3</sup> Faculty of Allied Medical Sciences, Isra University, Amman 11622, Jordan; dalia.ali@iu.edu.jo (D.A.)

\* Correspondence: dalia.ali@iu.edu.jo; Tel.: +962-79727417

**Table S1.** Cd(II) uptake by the polyester as a function of contact time, at pH=4.00, Temp 25 °C, 35 °C 45 °C and initial concentration of 150 ppm.

| pH=4.00 and 25.0 °C |                       |               |          |                              |
|---------------------|-----------------------|---------------|----------|------------------------------|
| Time (h)            | C <sub>e</sub> (mg/L) | Uptake (mg/g) | % Uptake | t/q <sub>t</sub> (hour g/mg) |
| 0.5                 | 139.03                | 2.68          | 7.31     | 0.19                         |
| 1                   | 120.32                | 7.42          | 19.79    | 0.13                         |
| 2                   | 113.80                | 9.05          | 24.13    | 0.22                         |
| 4                   | 110.52                | 9.87          | 26.32    | 0.41                         |
| 6                   | 109.22                | 10.20         | 27.19    | 0.59                         |
| 8                   | 102.02                | 12.00         | 31.99    | 0.67                         |
| 10                  | 98.33                 | 12.92         | 34.45    | 0.77                         |
| 18                  | 90.12                 | 14.97         | 39.92    | 1.20                         |
| 24                  | 83.90                 | 16.53         | 44.07    | 1.45                         |
| 48                  | 38.30                 | 27.93         | 74.47    | 1.72                         |
| pH=4.00 and 35.0 °C |                       |               |          |                              |
| 0.5                 | 139.80                | 3.06          | 6.80     | 0.16                         |
| 1                   | 126.30                | 7.11          | 15.80    | 0.14                         |
| 2                   | 96.54                 | 16.04         | 35.64    | 0.12                         |
| 4                   | 90.17                 | 17.95         | 39.89    | 0.22                         |
| 6                   | 88.77                 | 18.37         | 40.82    | 0.33                         |
| 8                   | 86.69                 | 18.99         | 42.46    | 0.42                         |
| 10                  | 81.47                 | 20.56         | 45.69    | 0.49                         |
| 18                  | 60.31                 | 26.91         | 59.79    | 0.67                         |
| 24                  | 27.03                 | 36.89         | 81.98    | 0.65                         |
| 48                  | 24.50                 | 37.65         | 83.67    | 1.27                         |
| pH=4.00 and 45.0 °C |                       |               |          |                              |
| 0.5                 | 101.00                | 14.70         | 32.67    | 0.034                        |
| 1                   | 100.50                | 14.85         | 33.00    | 0.067                        |
| 2                   | 98.40                 | 15.48         | 34.4     | 0.13                         |
| 4                   | 94.85                 | 16.55         | 36.77    | 0.24                         |

**Citation:** Alregeb, F.; Khalili, F.; Sweileh, B.; Ali, D. Synthesis and Characterization of Chelating Hyperbranched Polyester Nanoparticles for Cd(II) Ion Removal from Water. *Molecules* **2022**, *27*, 3656. <https://doi.org/10.3390/molecules27123656>

Academic Editors: Shaojun Yuan, Ying Liang, Changkun Liu and Xiaoying Liu

Received: 26 May 2022

Accepted: 4 June 2022

Published: 7 June 2022

**Publisher's Note:** MDPI stays neutral with regard to jurisdictional claims in published maps and institutional affiliations.

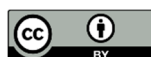

**Copyright:** © 2022 by the authors. Submitted for possible open access publication under the terms and conditions of the Creative Commons Attribution (CC BY) license (<https://creativecommons.org/licenses/by/4.0/>).

---

|    |       |       |       |      |
|----|-------|-------|-------|------|
| 6  | 90.31 | 17.91 | 39.79 | 0.34 |
| 8  | 80.62 | 20.81 | 46.25 | 0.38 |
| 10 | 79.42 | 21.17 | 47.05 | 0.47 |
| 18 | 59.22 | 27.23 | 60.52 | 0.66 |
| 24 | 19.56 | 39.13 | 86.96 | 0.61 |
| 48 | 20.32 | 38.90 | 86.45 | 1.23 |
